# Supplementary material for: Design, synthesis and biological evaluation of novel nitric oxide-donating podophyllotoxin derivatives as potential antiproliferative agents against multi-drug resistant leukemia cells
Source: Royal Society of Chemistry journal article supplement (doi:10.1039/c8ra06360e), 2018-01-01

# Design, synthesis and biological evaluation of novel nitric oxide-donating podophyllotoxin derivatives as potential antiproliferative agents against multi-drug resistant leukemia cells

Lei Zhang <sup>a,\*</sup>, Ying Rong <sup>b</sup>, Jie Zheng <sup>c</sup>, Chengli Yang <sup>a</sup>, Yongzheng Chen <sup>a</sup>,  
Jing Wang <sup>a,\*</sup> and Gang Wei <sup>d,\*</sup>

---

<sup>a</sup> Generic Drug Research Center of Guizhou Province, Green Pharmaceuticals Engineering Research Center of Guizhou Province, School of Pharmacy, Zunyi Medical University, Zunyi 563003, PR China

<sup>b</sup> Second Department of Pediatrics, Affiliated Hospital of Zunyi Medical University, Zunyi 563003, PR China

<sup>c</sup> Department of Nephrology & Rheumatology, Affiliated Hospital of Zunyi Medical University, Zunyi 563003, PR China

<sup>d</sup> CSIRO Manufacturing, PO Box 218, Lindfield, NSW 2070, Australia

---

Corresponding authors: lzhang@zmc.edu.cn (L.Z.); wangjing@zmc.edu.cn (J.W.); gang.wei@csiro.au (G.W.).

## Contents

|                                                |   |
|------------------------------------------------|---|
| Copy of <sup>1</sup> H NMR of <b>S1</b> .....  | 2 |
| Copy of <sup>13</sup> C NMR of <b>S1</b> ..... | 3 |
| Copy of HR-MS of <b>S1</b> .....               | 4 |
| Copy of <sup>1</sup> H NMR of <b>S2</b> .....  | 5 |
| Copy of <sup>13</sup> C NMR of <b>S2</b> ..... | 6 |
| Copy of HR-MS of <b>S2</b> .....               | 7 |

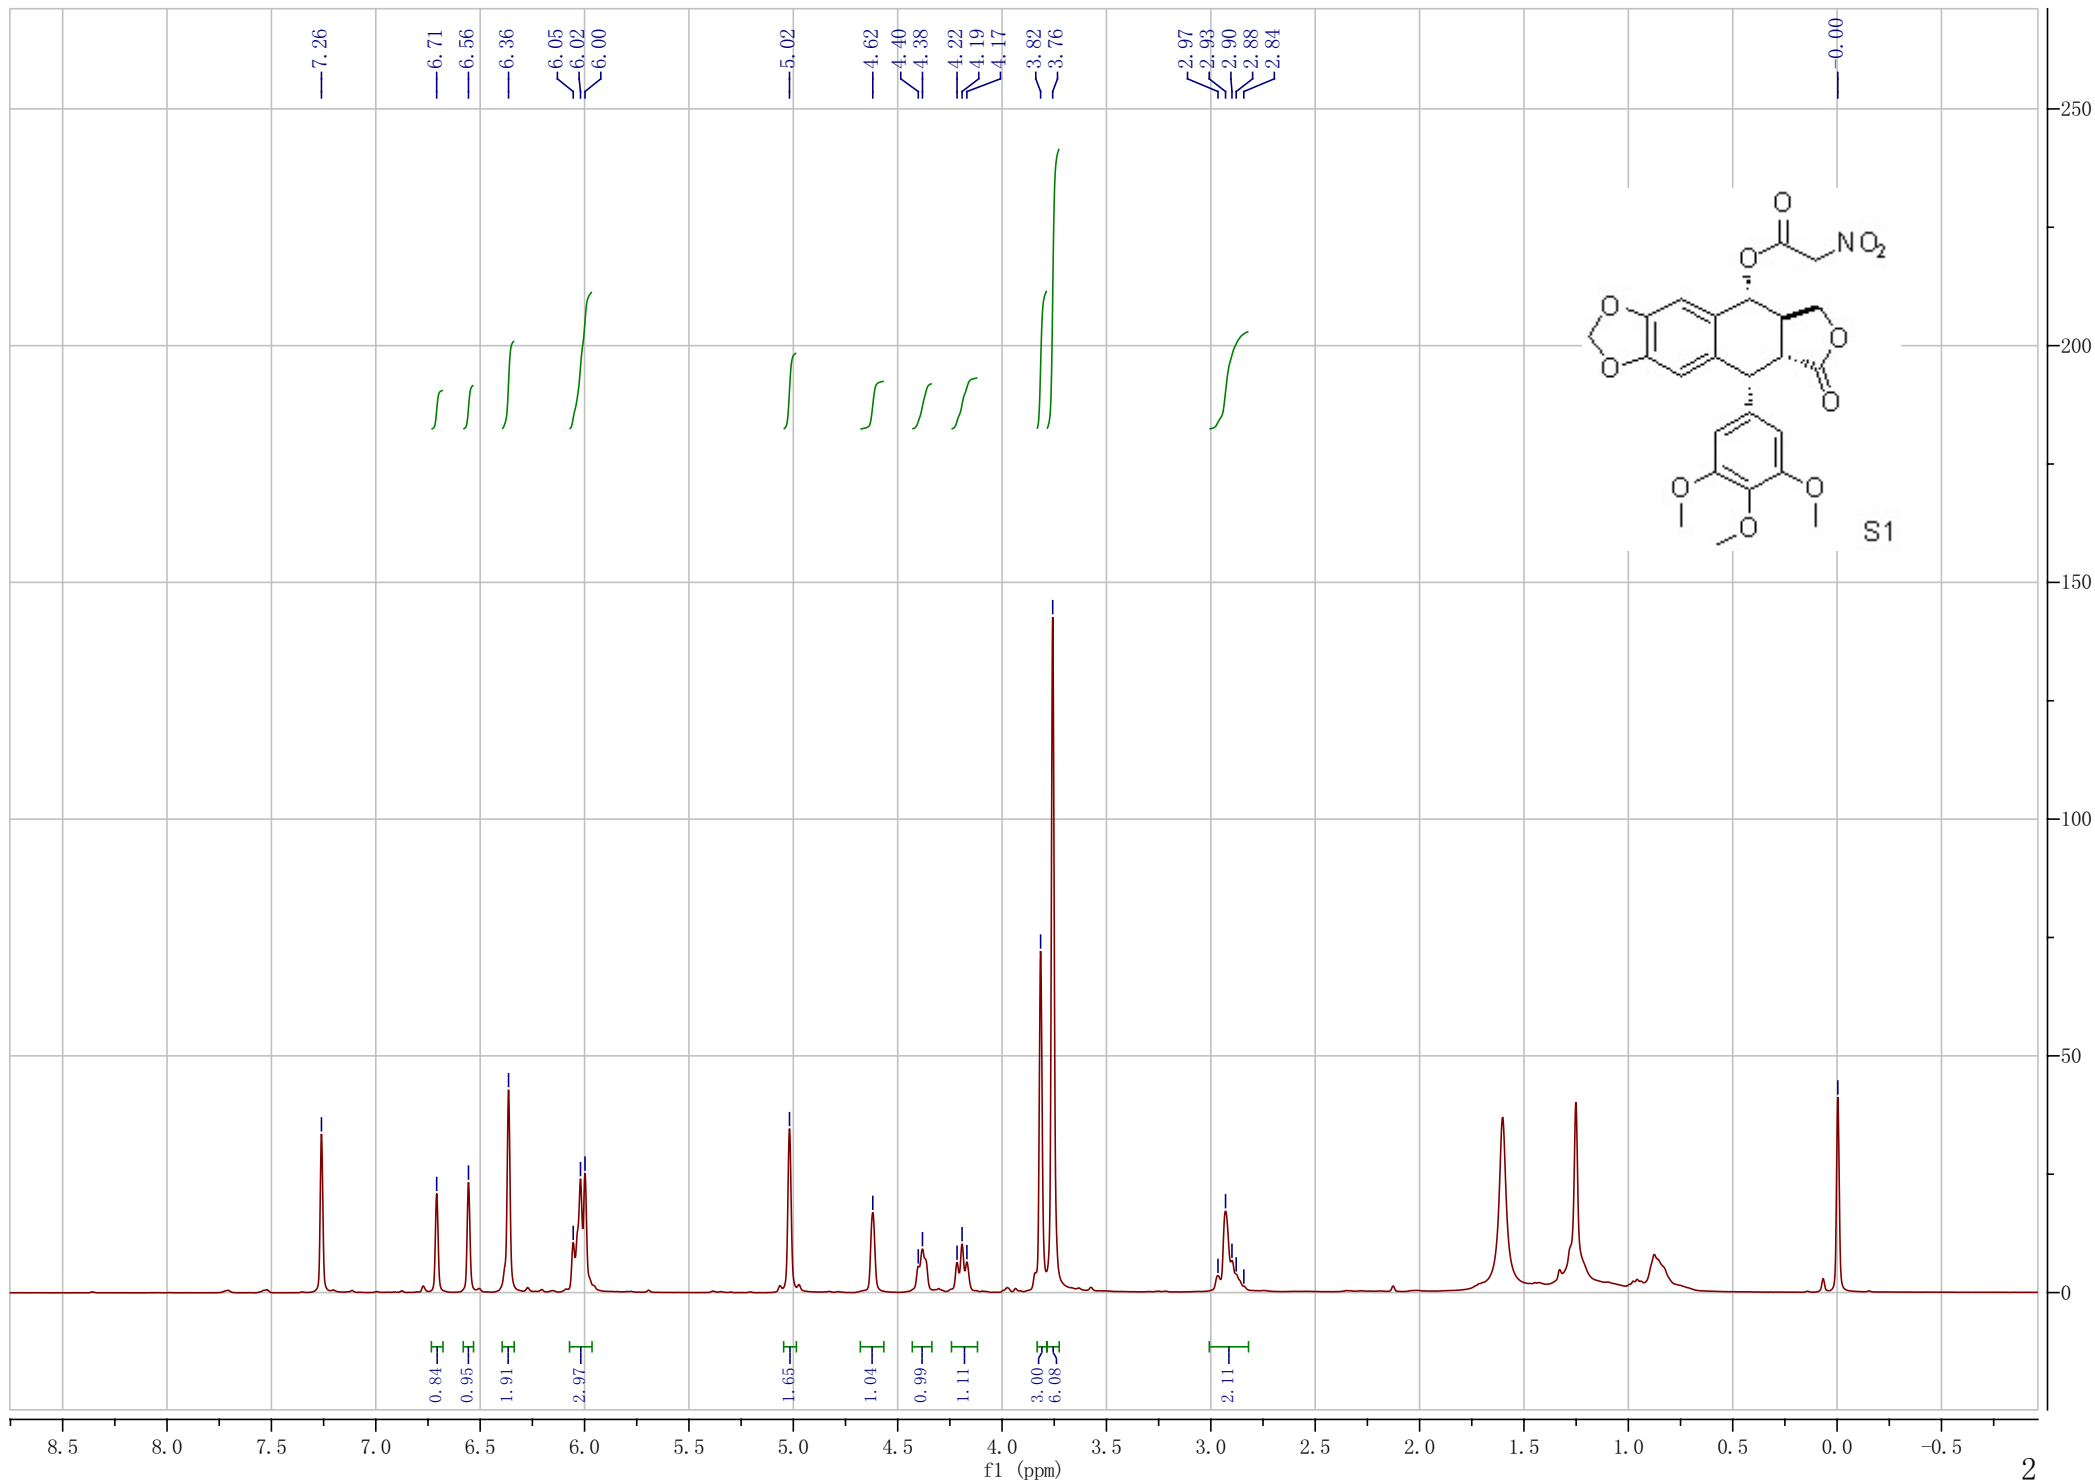

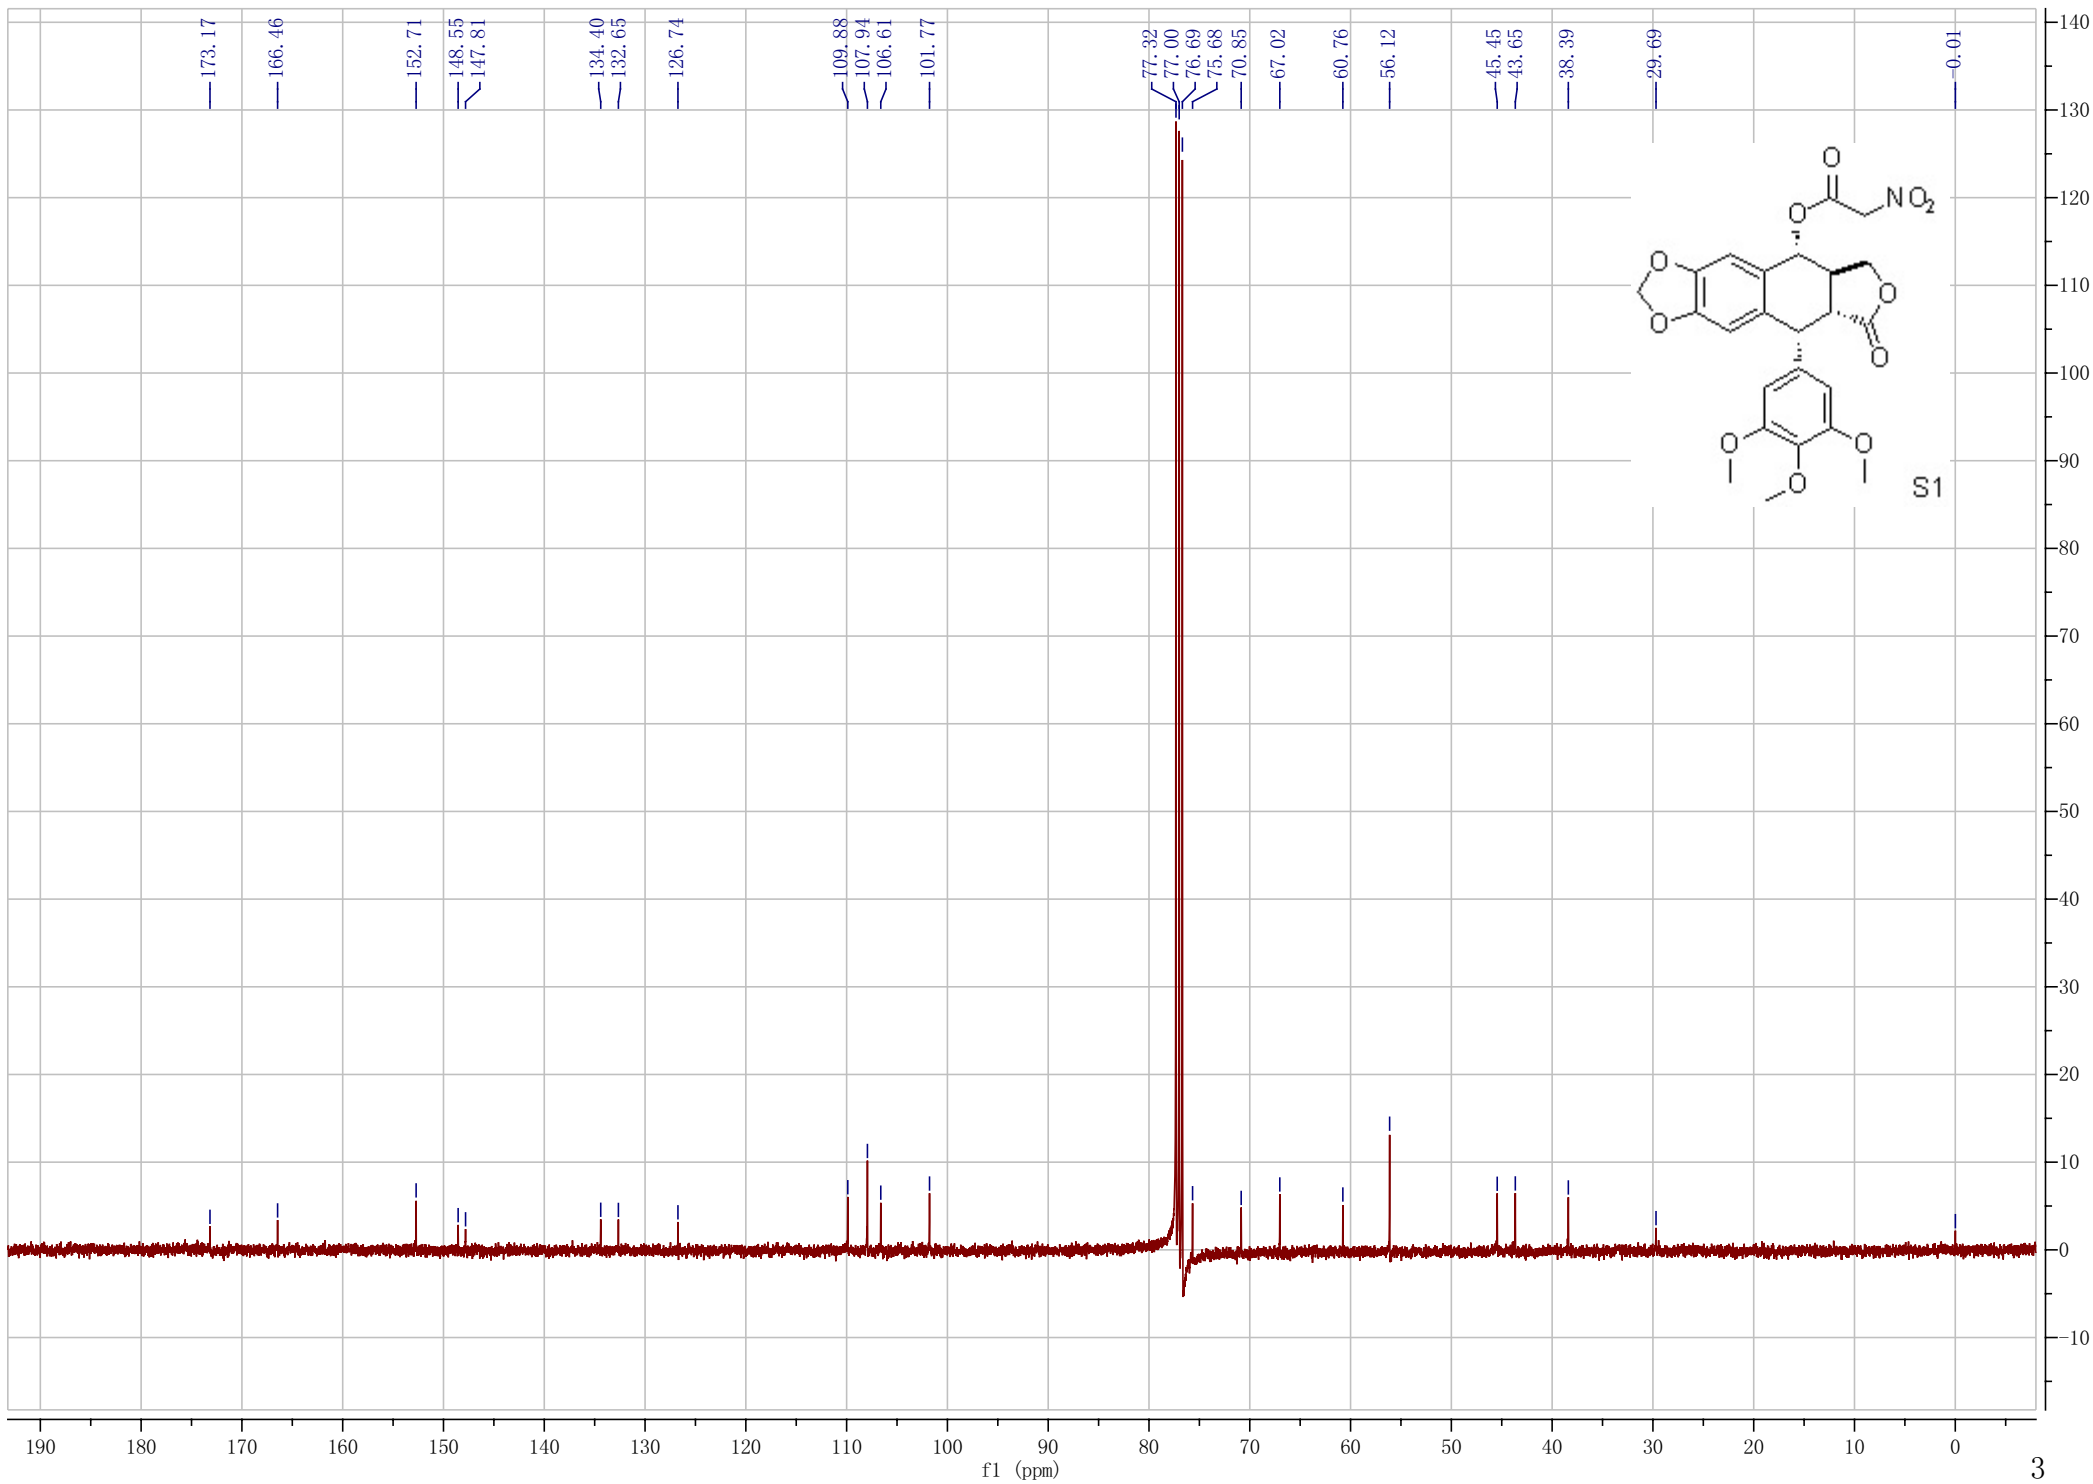

S1 HR-MS

S1 #263 RT: 3.11 AV: 1 NL: 8.90E7  
T: FTMS + p ESI Full ms [100.00-1500.00]

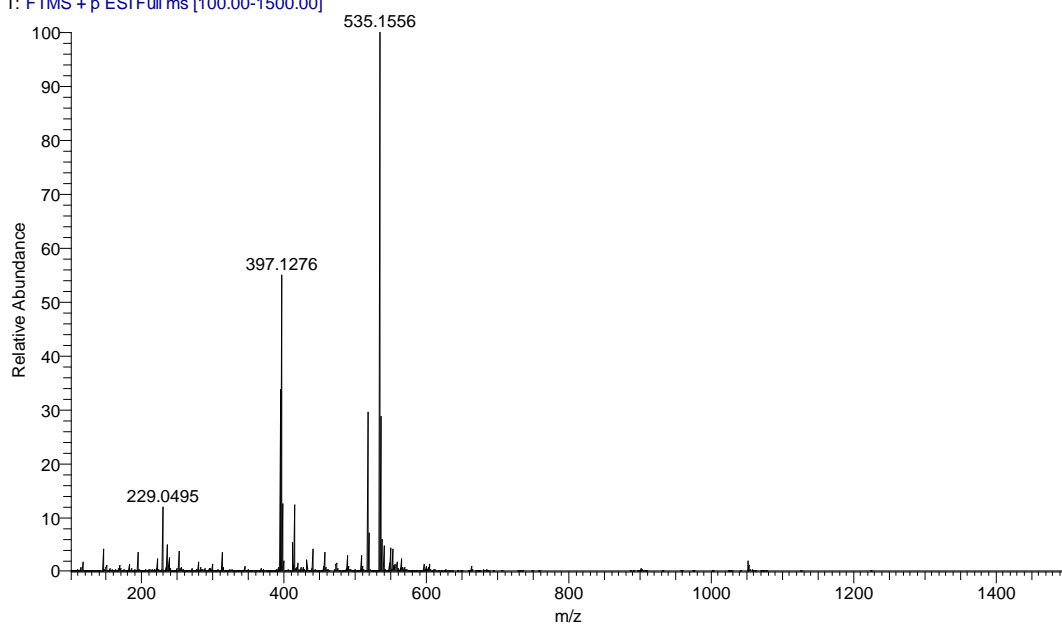



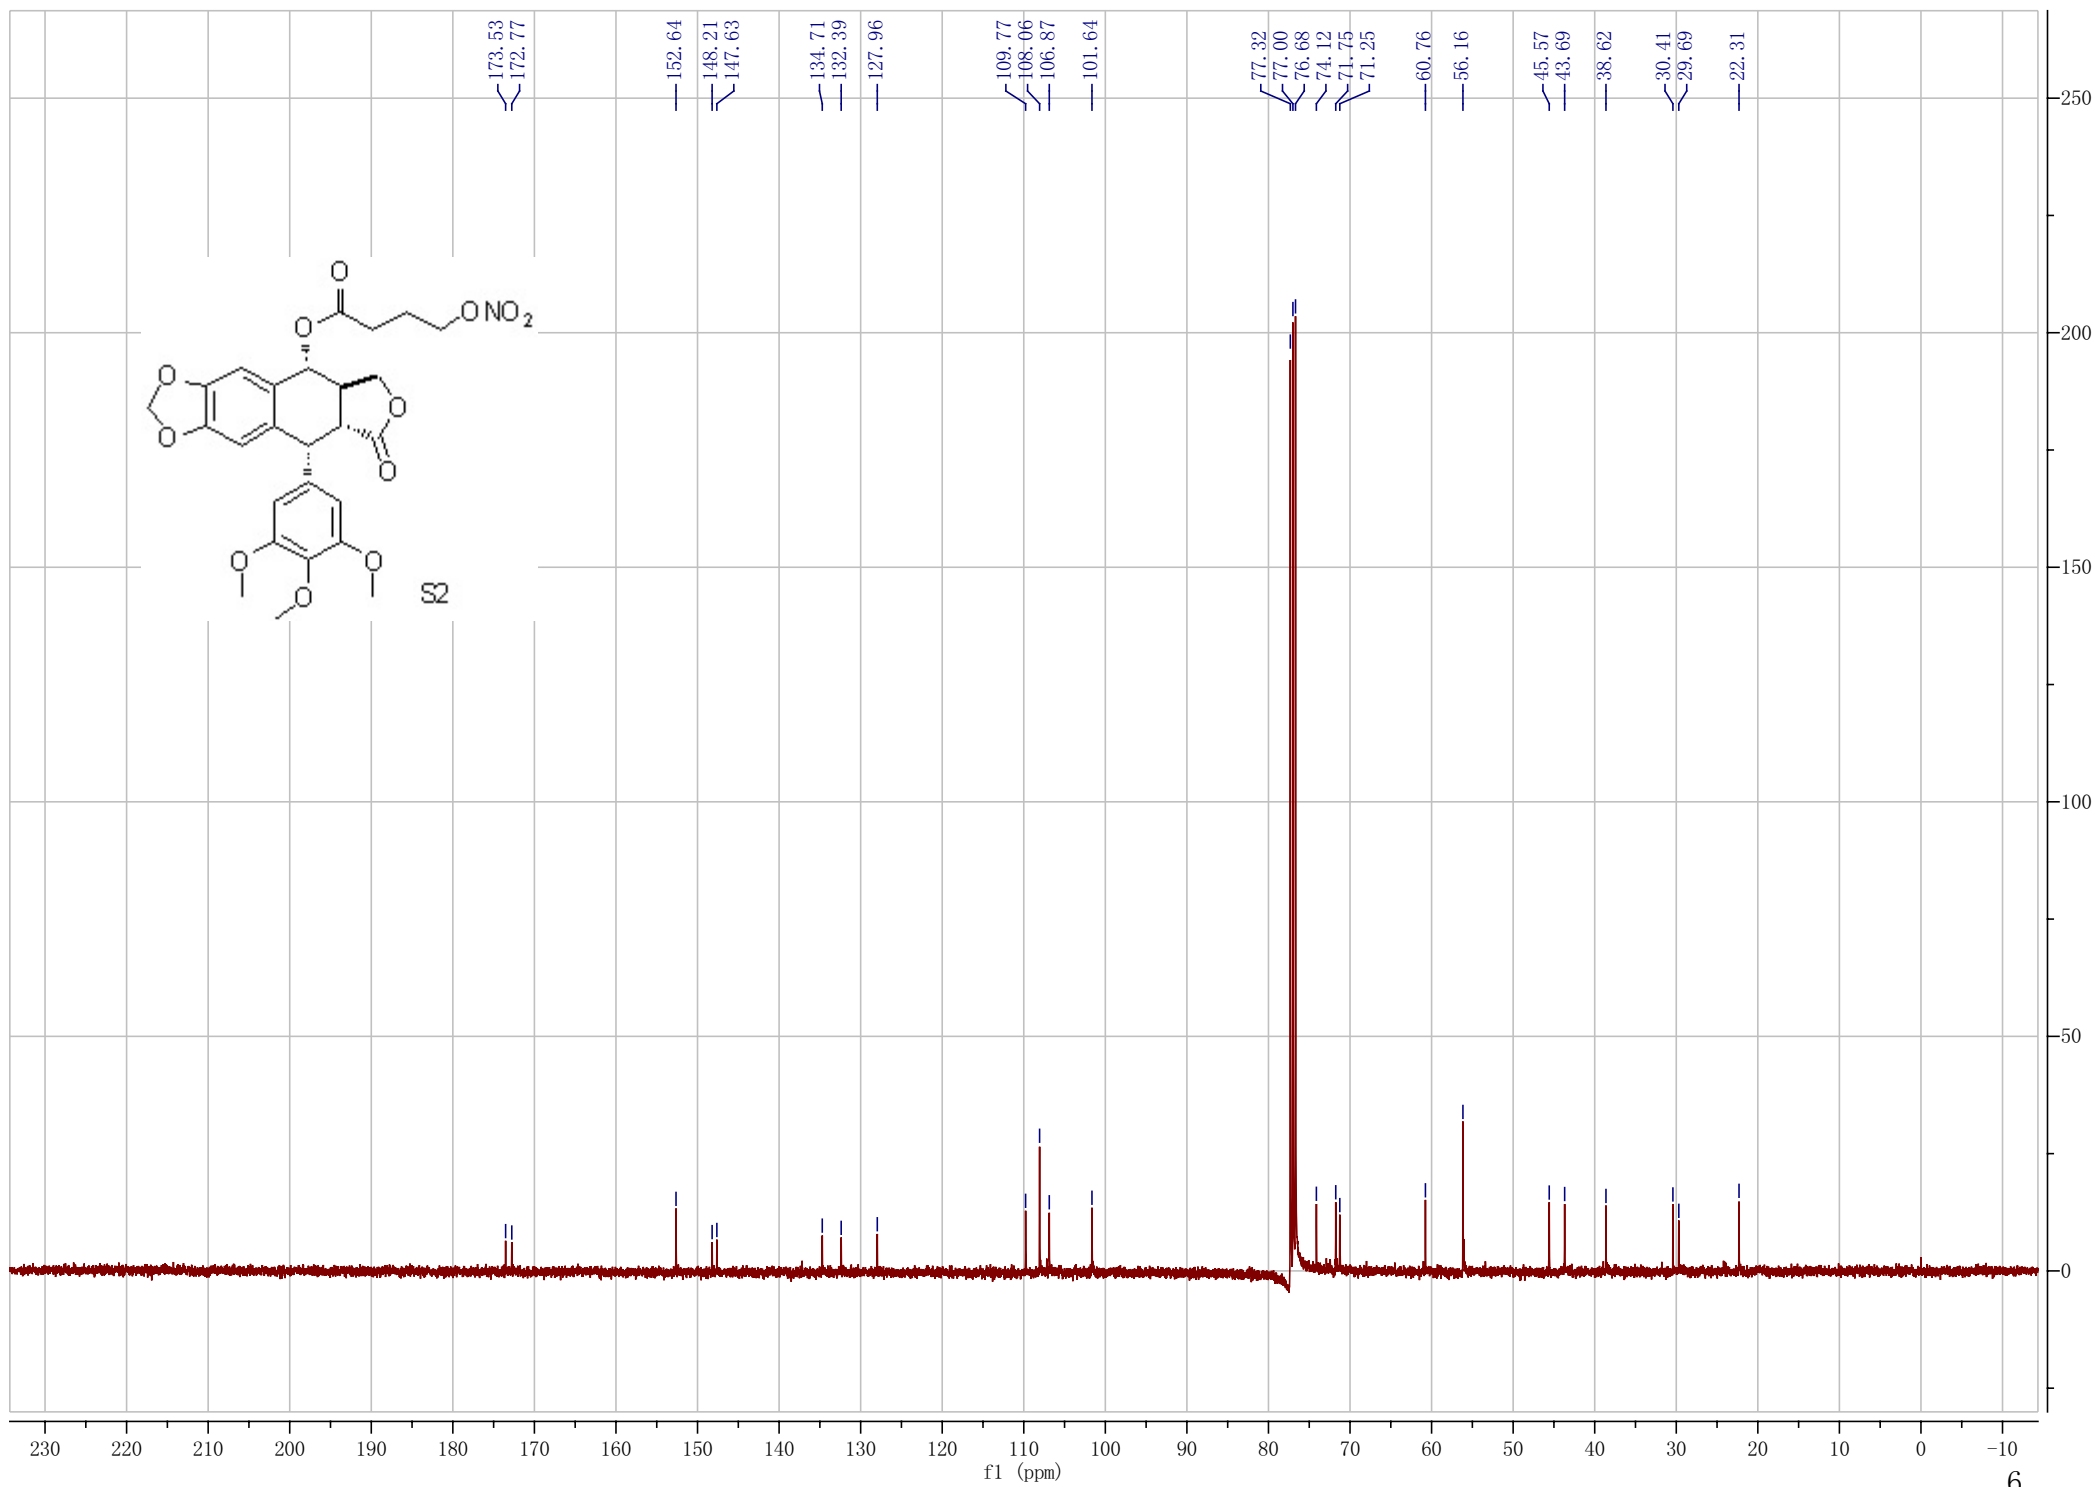

S2 HR-MS

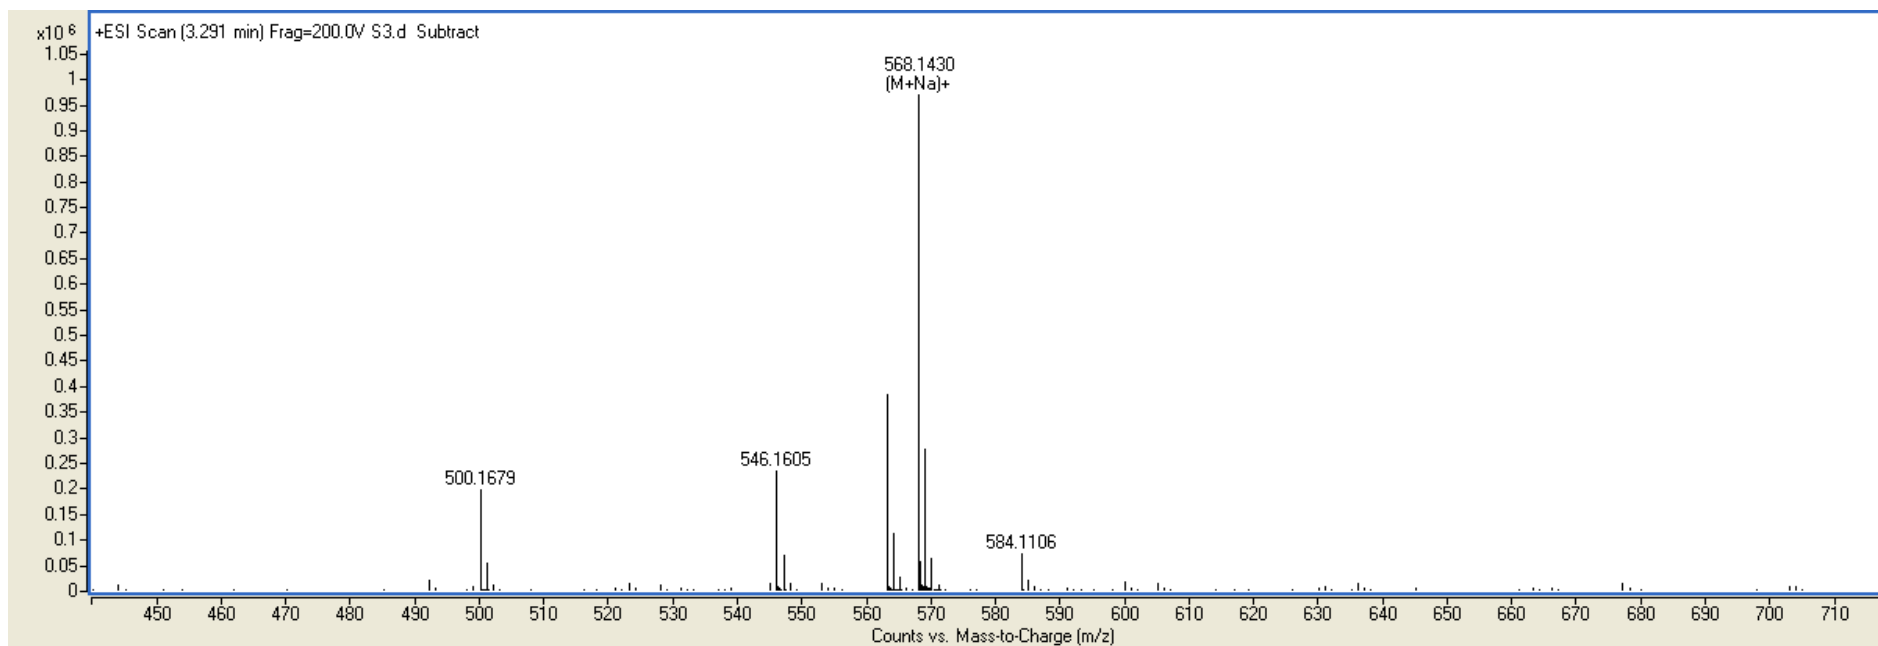

Supplement: c8ra06360e1.pdf [file c8ra06360e1.pdf]
